# Supplementary material for: Aerosol optical properties and trace gas emissions by PAX and OP-FTIR for laboratory-simulated western US wildfires during FIREX
Source: Copernicus journal article supplement (doi:10.5194/acp-18-2929-2018), 2018-03-01
Supplement: Supplementary file 1 [file acp-18-2929-2018-supplement.zip]

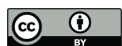

*Supplement of*

## **Aerosol optical properties and trace gas emissions by PAX and OP-FTIR for laboratory-simulated western US wildfires during FIREX**

**Vanessa Selimovic et al.**

*Correspondence to:* Robert J. Yokelson ([bob.yokelson@umontana.edu](mailto:bob.yokelson@umontana.edu))

- [acp-18-2929-2018-supplement-title-page.pdf](#)
- [acp-2017-859-sp\\_UPDATED\\_5.xlsx](#)

The copyright of individual parts of the supplement might differ from the CC BY 4.0 License.
